# Supplementary material
Source: PubMed Central journal article supplement (PMC11373930)

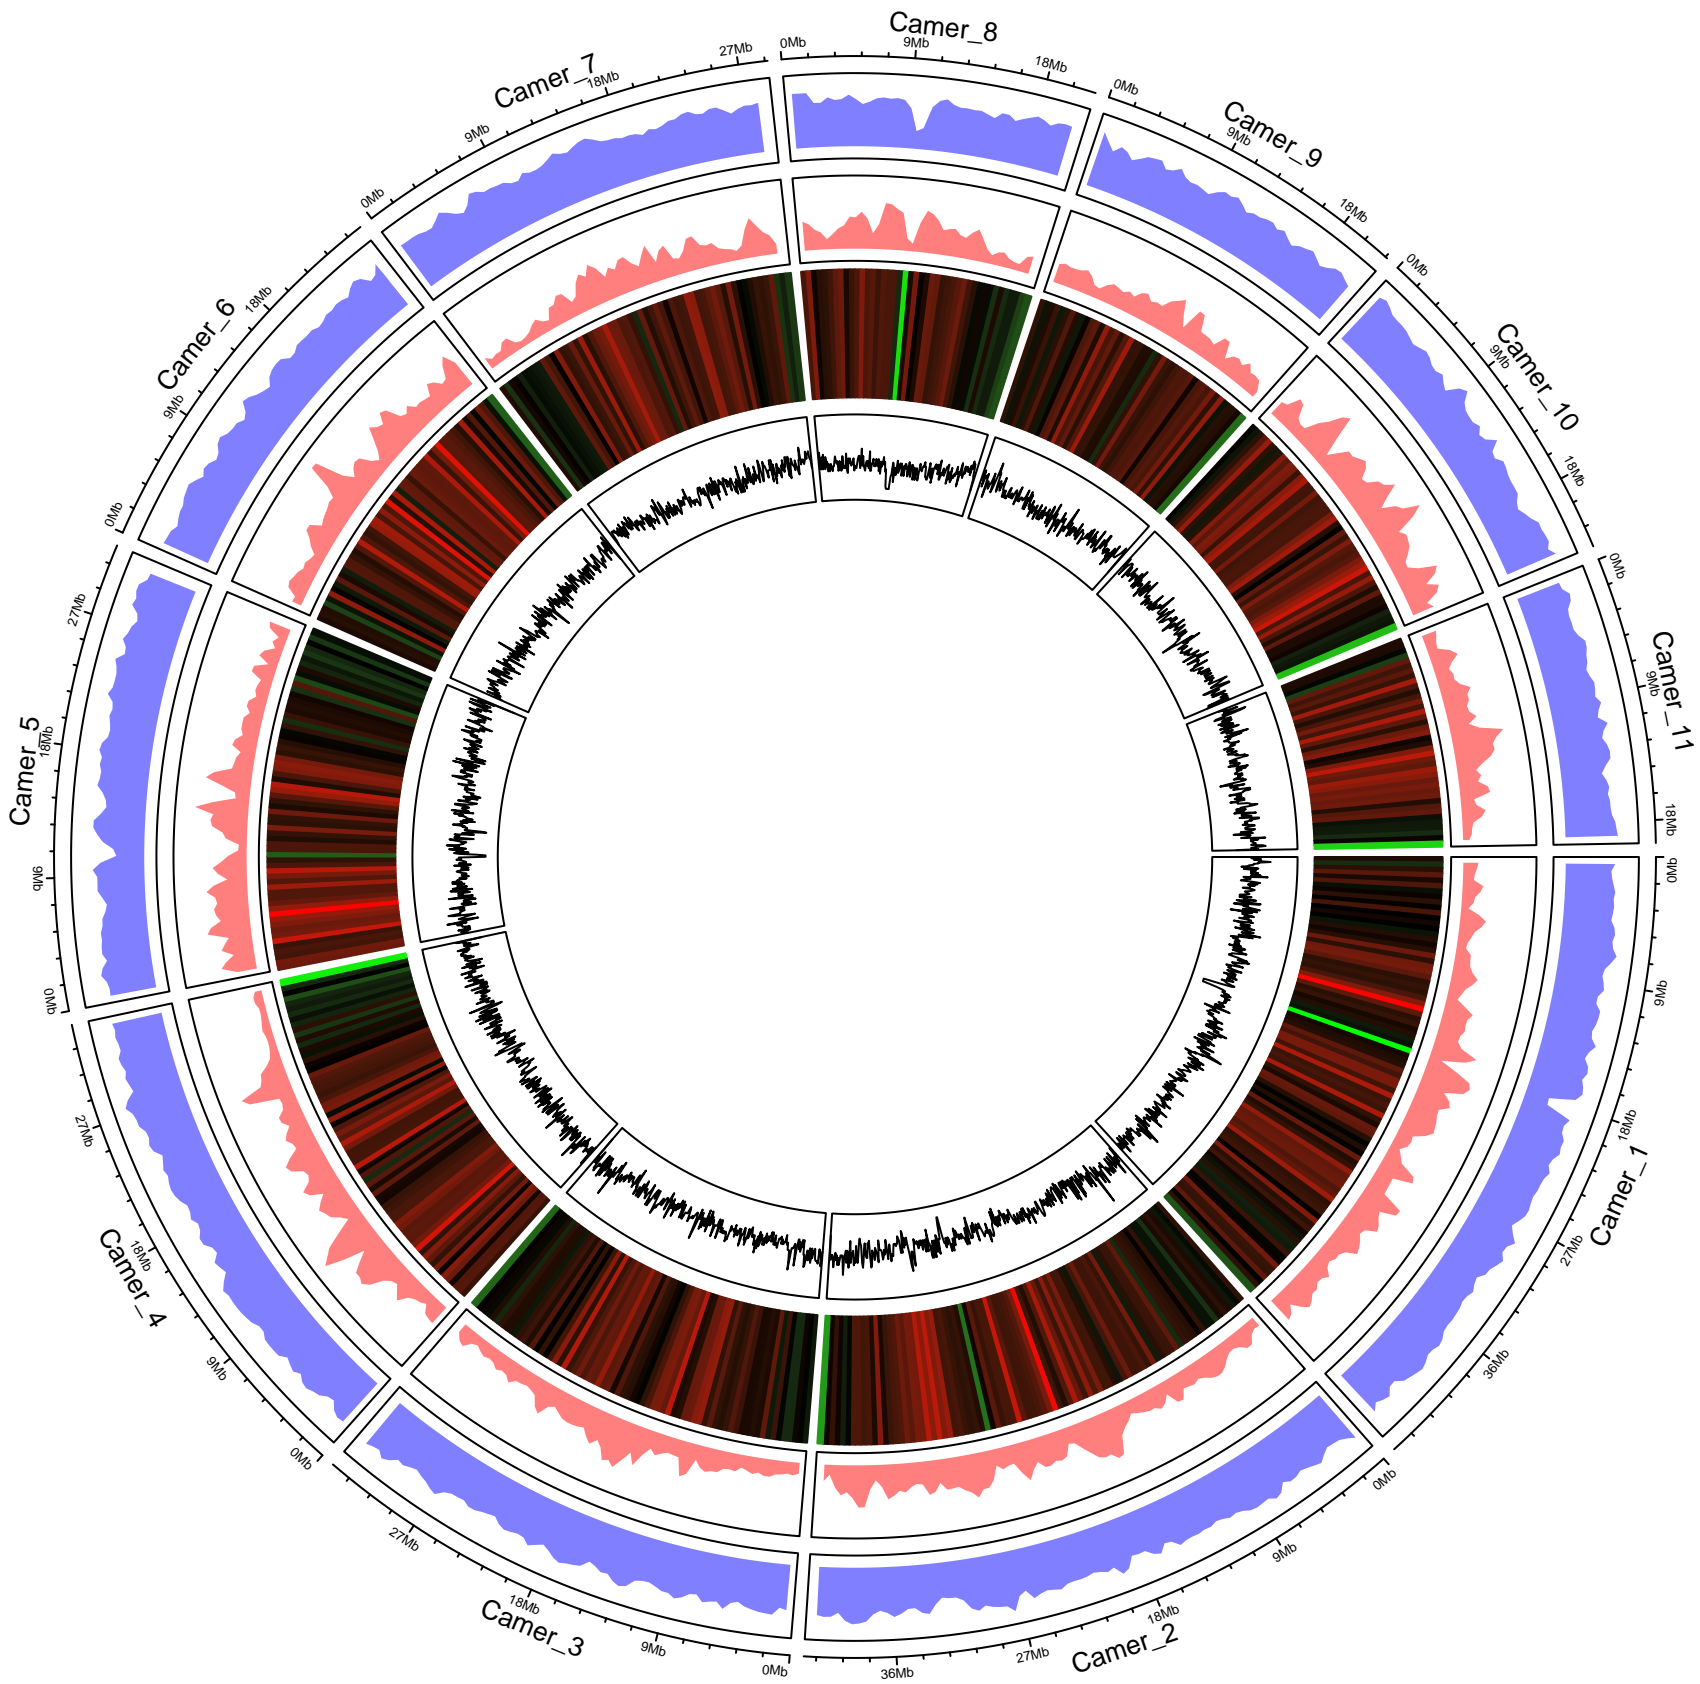

Supplement: PBI-22-472-s004.pdf [file PBI-22-472-s004.pdf]
